# Supplementary material
Source: Research Square preprint supplement (doi:10.21203/rs.3.rs-9414495/v1)
Supplement: Supplementary file 4 [file d87561796eababe6d2455c68.pdf]

## Supplementary data

### Supplementary Table S2

#### Distribution of $Pts^{inh}$ based on WT readthrough

**A**

| <i>WT Rdthr</i> | 0      | $\geq 1$ | $\geq 2$ | $\geq 3$ |
|-----------------|--------|----------|----------|----------|
| +               | 164    | 31       | 10       | 0        |
| (%)             | (20.1) | (13.4)   | (6.0)    | (0.0)    |
| -               | 653    | 200      | 156      | 136      |
| Total           | 817    | 231      | 166      | 136      |

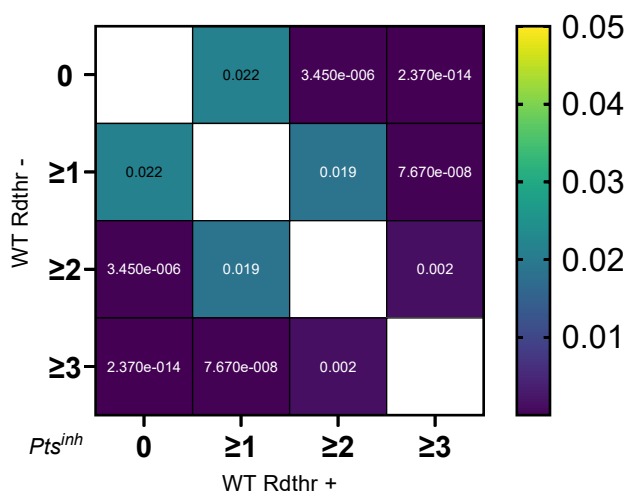

**B**

| <i>WT Rdthr</i> | 0      | $\geq 1$ | $\geq 2$ | $\geq 3$ |
|-----------------|--------|----------|----------|----------|
| +               | 116    | 31       | 10       | 0        |
| (%)             | (20.4) | (13.4)   | (6.0)    | (0.0)    |
| -               | 454    | 200      | 156      | 136      |
| Total           | 570    | 231      | 166      | 136      |

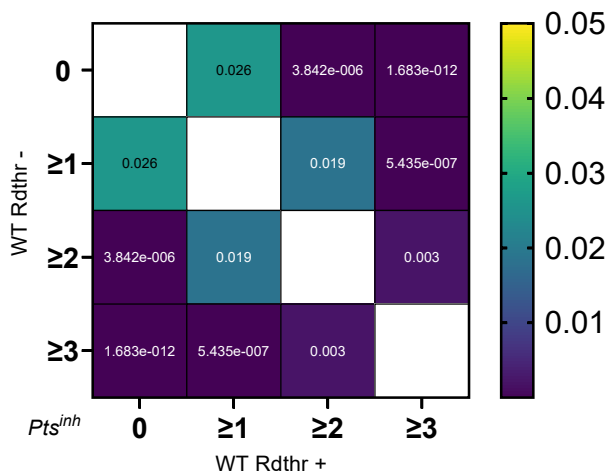

Data were obtained by the UAA=Tyr/Gln UGA= Trp and UAG=Tyr codification

**A**  $Pts^{inh=0}$ , all patients for whom inhibitor was not reported or was reported as negative;

**B**  $Pts^{inh=0}$  only patients for whom the absence of inhibitor was reported in the database

### Supplementary Table S3

Distribution of  $Pts^{inh}$  based on WT readthrough (UAG=Gln).

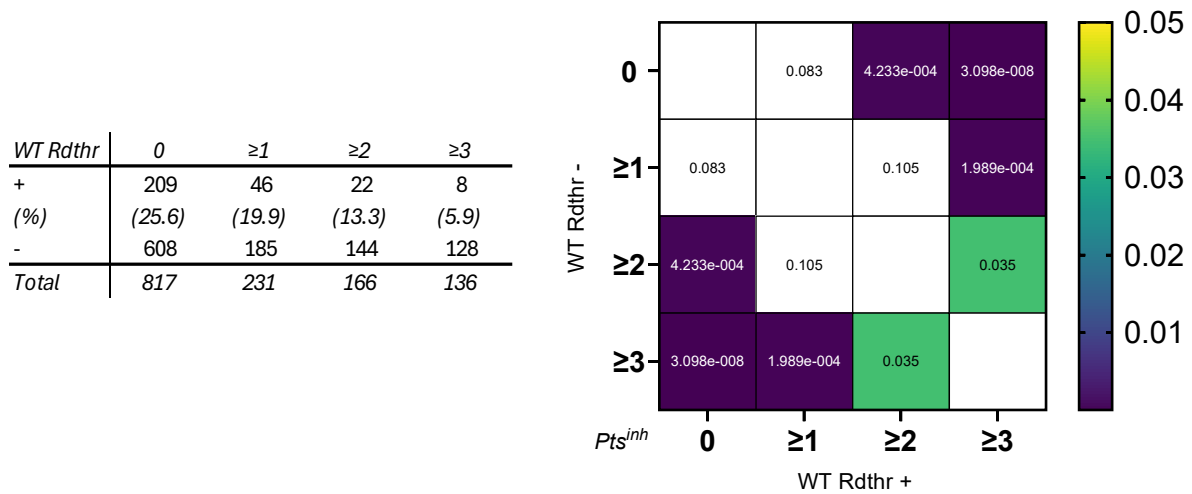

Data were obtained by the UAA=Tyr/Gln UGA= Trp and UAG=Gln codification

### Supplementary Table S4

WT readthrough among  $Pts^{inh=0}$  and  $Pts^{inh \geq 1}$  after implementation with CHAMP database data

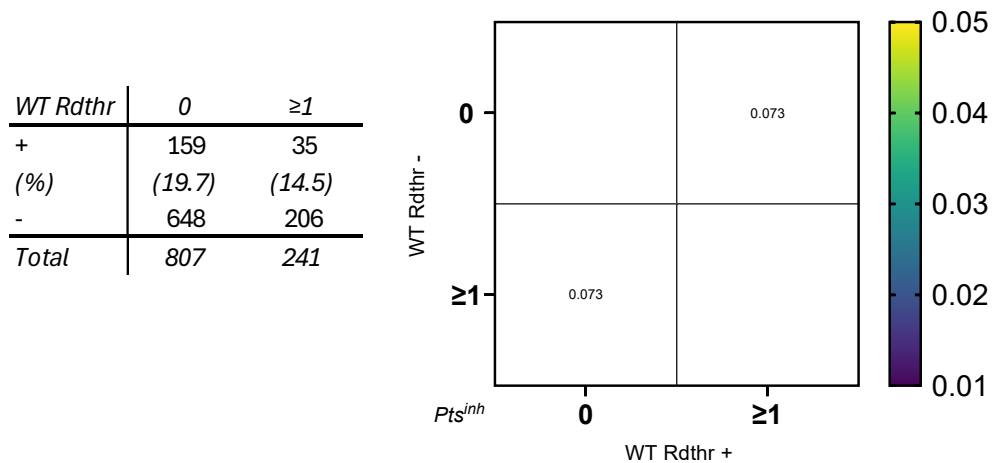

### Supplementary Table S5

Distribution of Pts<sup>inh</sup> for each PTC class.

| <i>Inh</i>   | <i>UGA</i> | <i>UAG</i> | <i>UAA</i> | <i>Total</i> |
|--------------|------------|------------|------------|--------------|
| +            | 146        | 59         | 26         | 231          |
| (%)          | (23.8)     | (24.3)     | (13.5)     |              |
| -            | 467        | 184        | 166        | 817          |
| <i>Total</i> | 613        | 243        | 192        | 1048         |

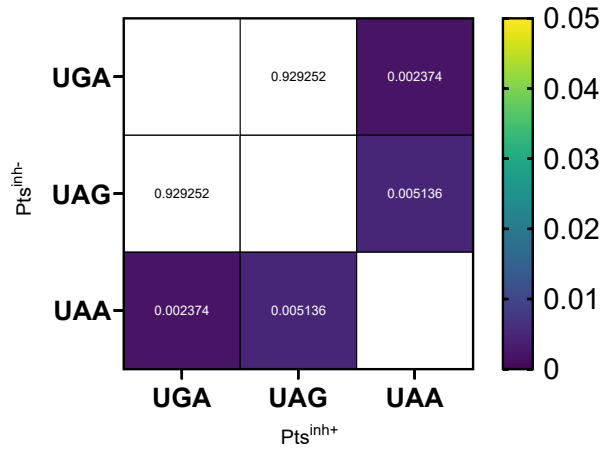

### Supplementary Table S6

Distribution for each PTC class of Pts with PTCs undergoing WT Rdthr

| <i>WT Rdthr</i> | <i>UGA</i> | <i>UAG</i> | <i>UAA</i> | <i>Total</i> |
|-----------------|------------|------------|------------|--------------|
| +               | 69         | 28         | 98         | 195          |
| (%)             | (11.2)     | (11.5)     | (51.0)     |              |
| <i>Total</i>    | 613        | 243        | 192        | 1048         |

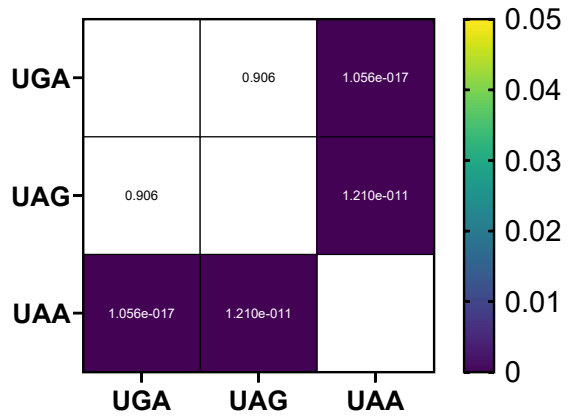

### Supplementary Table S7

#### Distribution of Pts<sup>inh</sup> for each tetranucleotide class.

| Inh   | UGAC | UGAA | UGAU | UGAG | UAGU | UAGC | UAGA | UAGG | UAAC | UAAG | UAUU | UAAA | Total |
|-------|------|------|------|------|------|------|------|------|------|------|------|------|-------|
| +     | 37   | 46   | 46   | 17   | 12   | 11   | 17   | 19   | 3    | 10   | 4    | 9    | 231   |
| (%)   | (24) | (23) | (27) | (19) | (22) | (35) | (21) | (24) | (10) | (15) | (16) | (12) |       |
| -     | 118  | 155  | 124  | 70   | 42   | 20   | 63   | 59   | 26   | 55   | 21   | 64   | 817   |
| Total | 155  | 201  | 170  | 87   | 54   | 31   | 80   | 78   | 29   | 65   | 25   | 73   | 1048  |

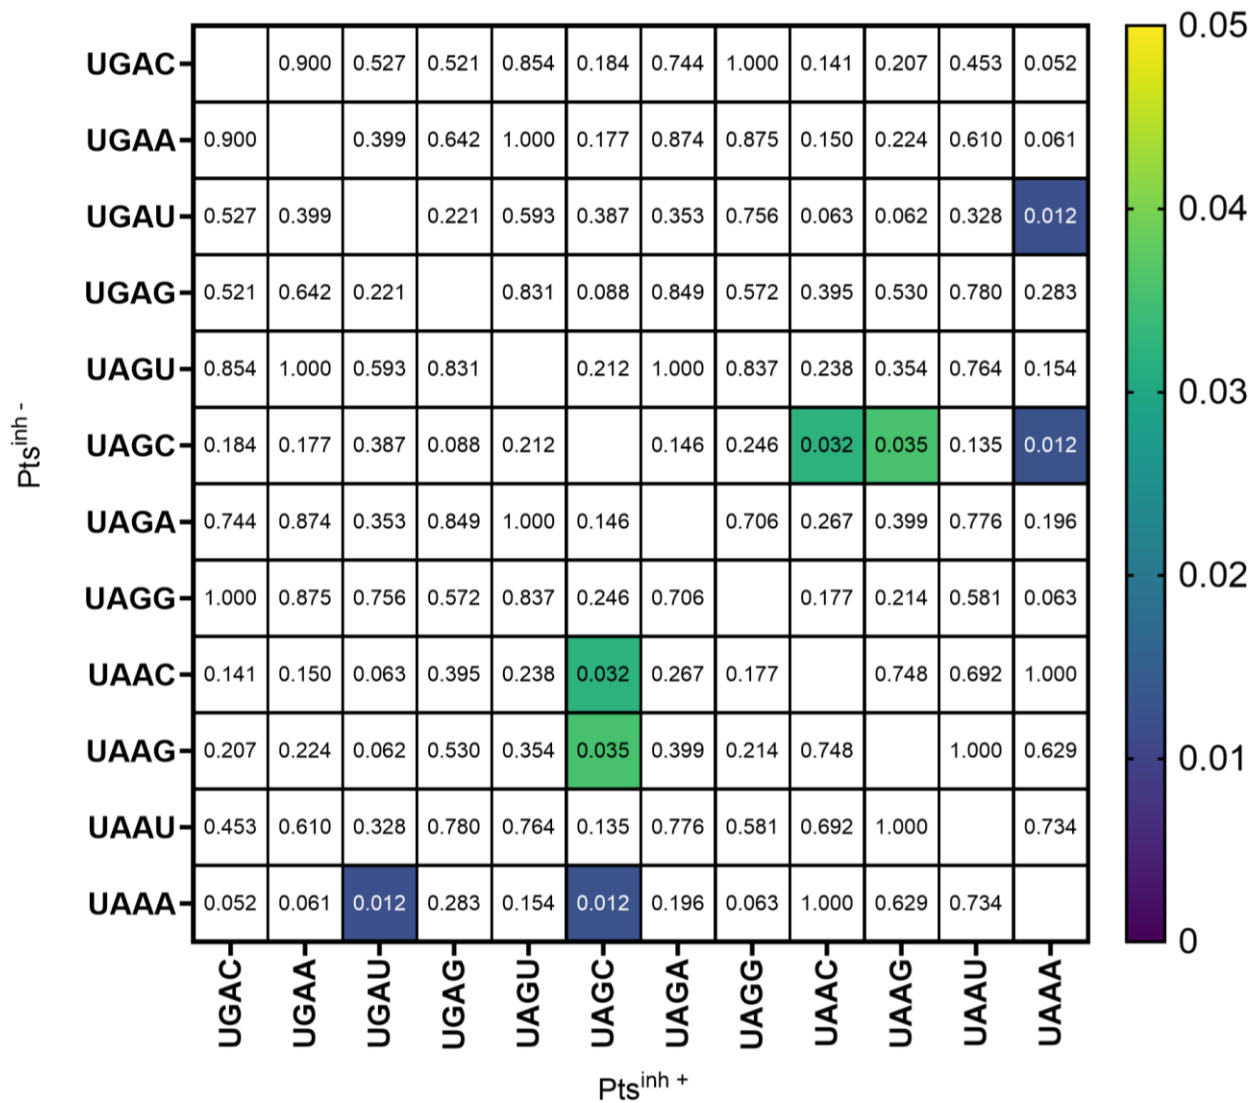

### Supplementary Table S8

Distribution of Pts with WT Rdthr for each tetranucleotide class.

| WT Rdthr | UGAC  | UGAA  | UGAU  | UGAG | UAGU | UAGC | UAGA  | UAGG  | UAAC  | UAAG | UAAU | UAAA   | Total |
|----------|-------|-------|-------|------|------|------|-------|-------|-------|------|------|--------|-------|
| +        | 2     | 3     | 1     | 3    | 3    | 4    | 0     | 1     | 3     | 4    | 2    | 5      | 31    |
| (%)      | (5.4) | (6.5) | (2.2) | (18) | (25) | (36) | (0.0) | (5.3) | (100) | (40) | (50) | (55.6) |       |
| -        | 35    | 43    | 45    | 14   | 9    | 7    | 17    | 18    | 0     | 6    | 2    | 4      | 200   |
| Total    | 37    | 46    | 46    | 17   | 12   | 11   | 17    | 19    | 3     | 10   | 4    | 9      | 231   |

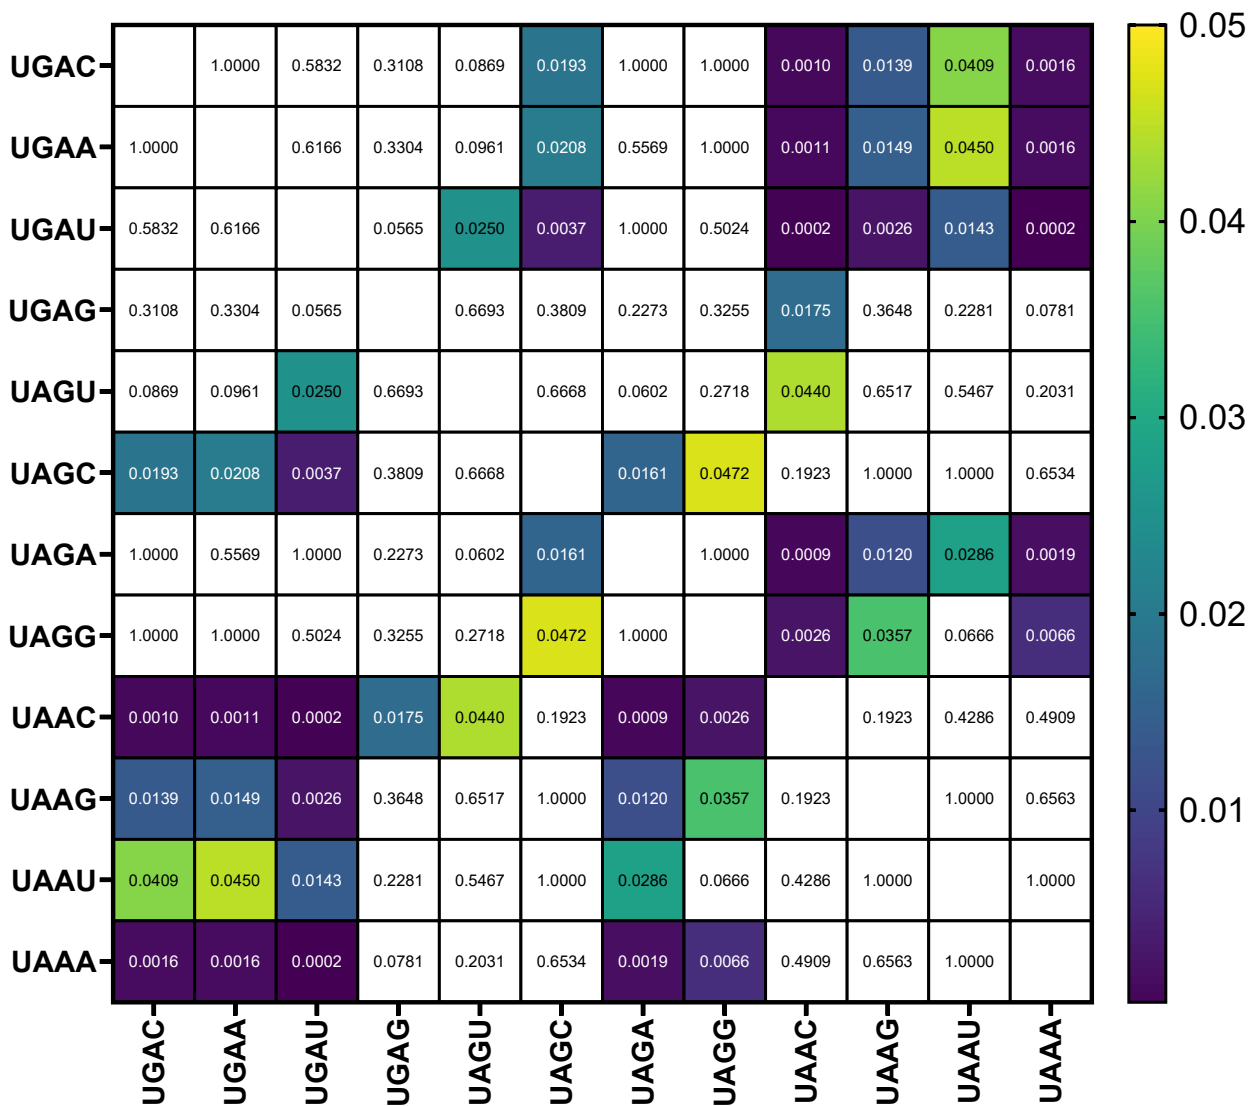

### Supplementary Table S9

Distribution of Pts<sup>inh</sup> for domain localization of PTCs and for PTC classes.

| Inh   | All PTC |        |          |        | UGA    |        |          | UAG    |        |          | UAA   |       |          |
|-------|---------|--------|----------|--------|--------|--------|----------|--------|--------|----------|-------|-------|----------|
|       | A1-A2   | B      | A3-C1-C2 | Total  | A1-A2  | B      | A3-C1-C2 | A1-A2  | B      | A3-C1-C2 | A1-A2 | B     | A3-C1-C2 |
| +     | 42      | 34     | 157      | 230    | 24     | 15     | 106      | 14     | 10     | 35       | 4     | 9     | 13       |
| (%)   | (14.7)  | (12.9) | (32.1)   | (22.4) | (14.8) | (15.6) | (31.6)   | (17.9) | (15.9) | (34.3)   | (8.7) | (8.6) | (30.9)   |
| -     | 244     | 229    | 322      | 795    | 138    | 81     | 229      | 64     | 53     | 67       | 42    | 95    | 29       |
| Total | 286     | 263    | 479      | 1028   | 162    | 96     | 335      | 78     | 63     | 102      | 46    | 104   | 42       |

### Supplementary Table S10

Distribution of Pts WT Rdthr based on FVIII domain localization of PTCs.

| WT Rdthr | A1-A2  | B      | A3-C1-C2 | Total |
|----------|--------|--------|----------|-------|
| +        | 72     | 72     | 51       | 195   |
| (%)      | (25.2) | (27.4) | (10.6)   |       |
| -        | 214    | 191    | 428      | 833   |
| Total    | 286    | 263    | 479      | 1028  |

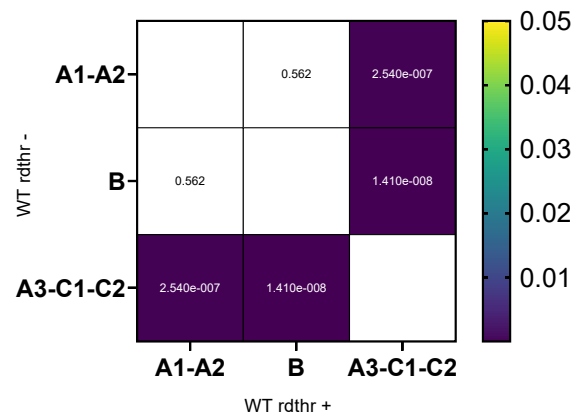

### Supplementary Table S11

Distribution of WT Rdthr for PTCs observed (EAHAD) and predicted (never reported) as single nucleotide variants.

| WT Rdthr | Observed | Predicted | Total |
|----------|----------|-----------|-------|
| +        | 105      | 144       | 249   |
| (%)      | (31)     | (22)      | (25)  |
| -        | 230      | 518       | 748   |
| Total    | 335      | 662       | 997   |

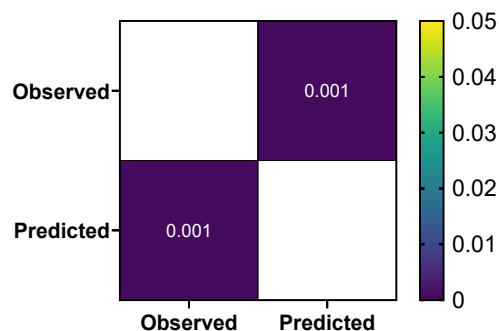

### Supplementary Table S12

Distribution for each PTC class of PTCs observed (EAHAD) and predicted (never reported) as single nucleotide variants.

|              | <i>Observed</i><br><i>n(%)</i> | <i>Predicted</i><br><i>n(%)</i> | <i>Total</i><br><i>n(%)</i> |
|--------------|--------------------------------|---------------------------------|-----------------------------|
| <i>UGA</i>   | 88(27)                         | 160(24)                         | 248(25)                     |
| <i>UAG</i>   | 122(36)                        | 223(34)                         | 345(35)                     |
| <i>UAA</i>   | 125(37)                        | 279(42)                         | 404(41)                     |
| <i>Total</i> | 335                            | 662                             | 997                         |

### Supplementary Table S13

Mean differential affinity, expressed as percentile ranking, of peptides obtained from WT Rdthr- PTCs grouped by PTC<sup>inh</sup> status and FVIII domain location.

| PTC <sup>inh</sup> | A1-A2 |      |      | B     |       |      | A3-C1-C2 |       |      |
|--------------------|-------|------|------|-------|-------|------|----------|-------|------|
|                    | 0     | ≥1   | ≥2   | 0     | ≥1    | ≥2   | 0        | ≥1    | ≥2   |
| Mean               | 0,53  | 0,80 | 3,00 | -2,25 | -0,55 | 1,32 | -0,48    | -0,04 | 0,34 |
| Standard error     | 0,16  | 0,37 | 0,66 | 0,19  | 0,29  | 0,86 | 0,23     | 0,21  | 0,38 |
| Count              | 1768  | 364  | 156  | 2574  | 728   | 104  | 1144     | 1118  | 442  |
| Variants number    | 68    | 14   | 6    | 99    | 28    | 4    | 44       | 43    | 17   |

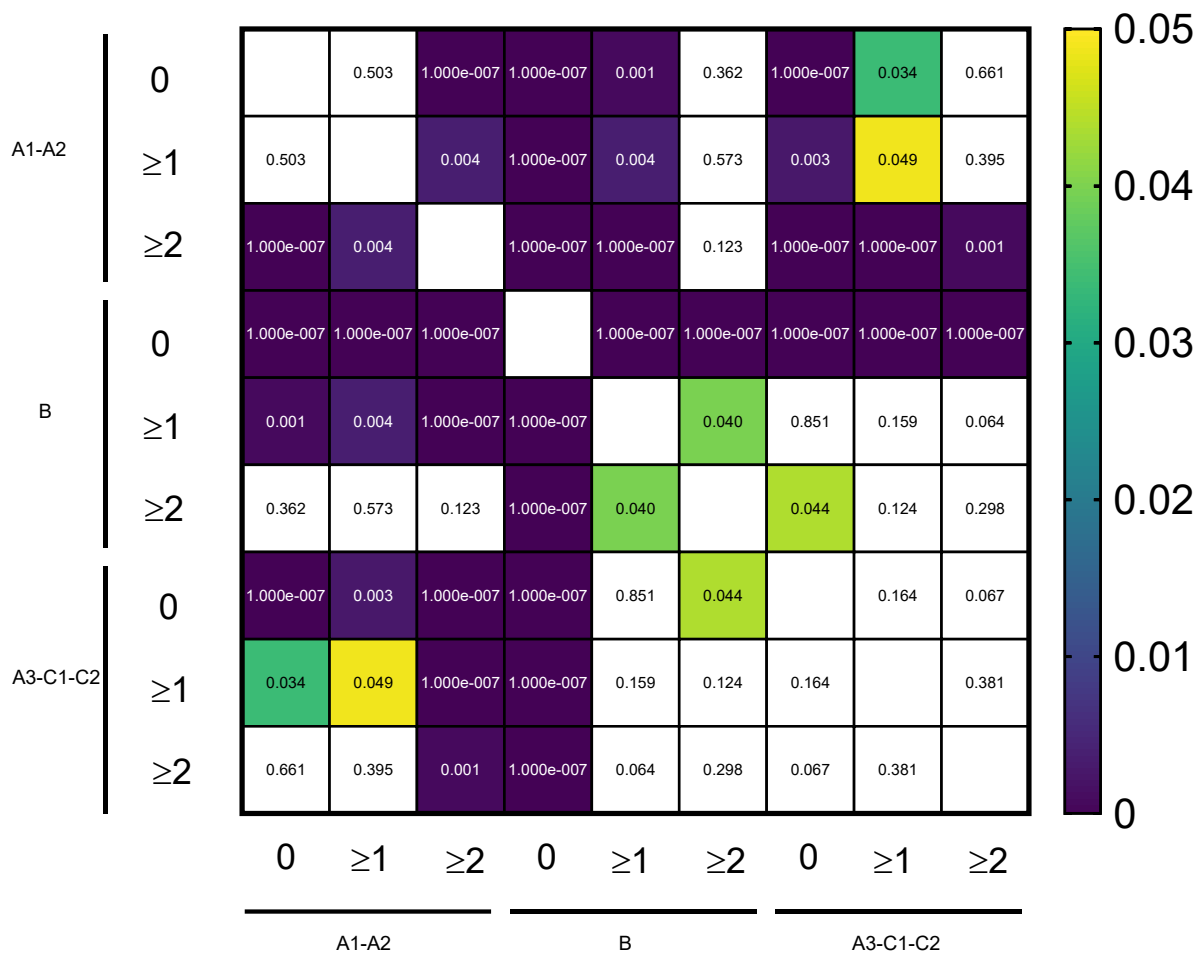

## Supplementary Figure S1

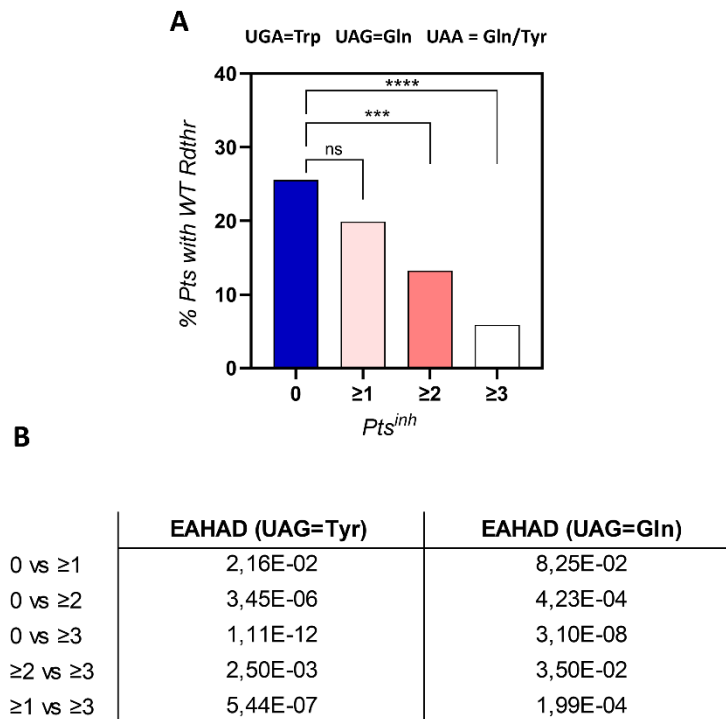

### Insertion of WT amino acid upon readthrough in the UAG=Gln model

A) HA patients with *F8* PTCs predicted to undergo WT readthrough, exploring Gln at UAG, were classified in accordance with PTCs associated with an increasing number of inhibitor-positive cases ( $Pts^{inh=0}$ , patients with PTCs never found in patients with inhibitors;  $Pts^{inh\geq 1}, Pts^{inh\geq 2}, Pts^{inh\geq 3}$ , patients affected by PTCs found in 1,2,3 or more patients with inhibitors). B) Statistical comparison between models with Tyr or Gln reinsertion at UAG. Statistical significance of Fisher's exact test.

## Supplementary Figure S2

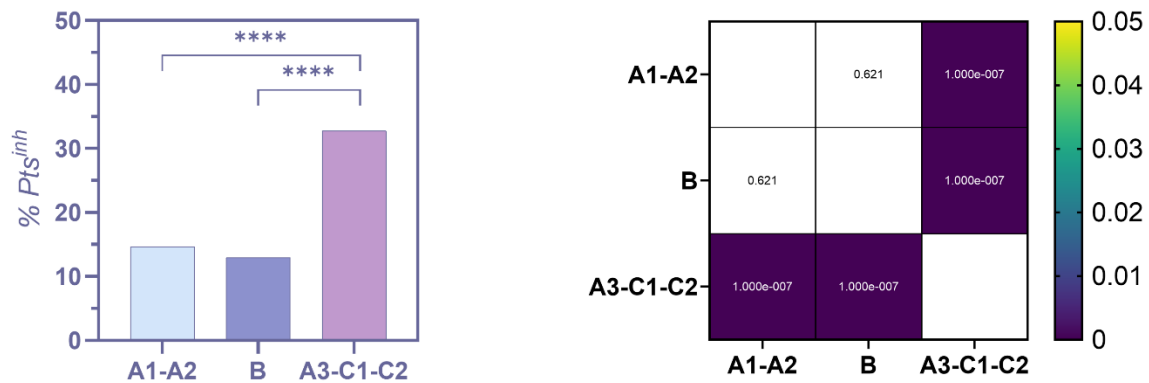

### Comparison of the percentage of Pts<sup>inh</sup> with PTCs in FVIII domains.

*Left panel.* Distribution of Pts<sup>inh</sup> with PTCs in grouped FVIII domains. *Right panel.* Statistical Comparison

## Supplementary Figure S3

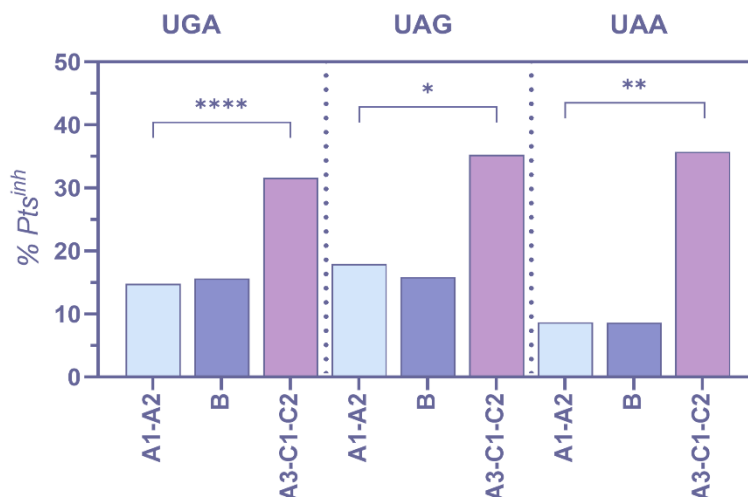

### Comparison of the percentage of Pts<sup>inh</sup> for PTCs in FVIII domains.

Distribution of Pts<sup>inh</sup> in relation to FVIII domain location of PTC classes (UGA/UAG/UAA).

### Supplementary Figure S4

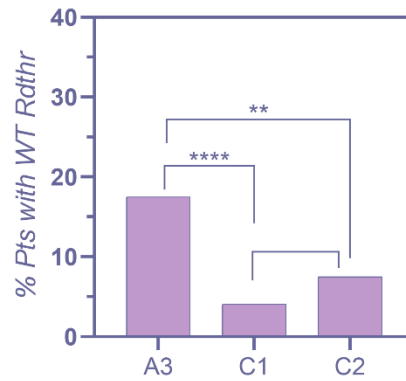

Comparison of the percentage of Pts with PTCs with WT Rdthr in single FVIII domains (A3, C1 and C2)

### Supplementary Figure S5

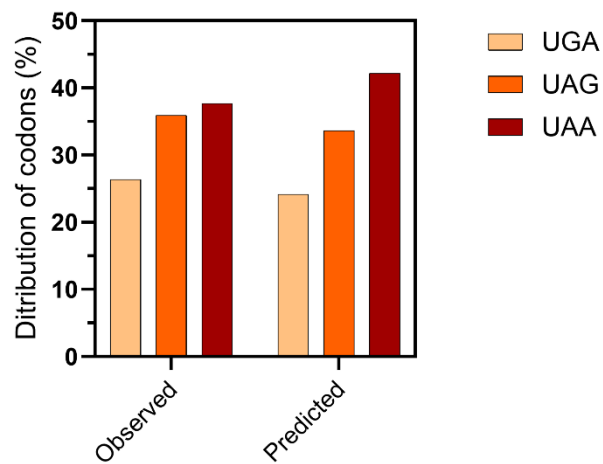

Comparison of observed (EAHAD) and predicted (never reported before) PTCs for each PTC class (UGA, UAG, UAA).

Prediction of PTCs produced by single nucleotide variants (SNV).

## Supplementary Figure S6

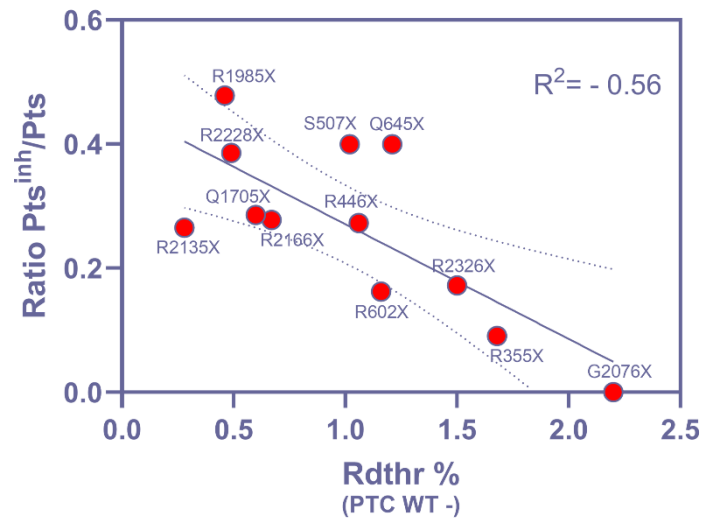

**Correlation between recombinant Rdthr output and ratio of patients with inhibitor on total number of patients for WT Rdthr- PTCs.**

Inverse relation between readthrough over PTCs WT –, excluding those within B domain, and ratio of patients with inhibitor on total number of patients for 12 PTCs WT – (red dots).
